# Supplementary material for: Taking advantage of β-hydroxy amine enhanced reactivity and functionality for the synthesis of dual covalent adaptable networks
Source: Royal Society of Chemistry journal article supplement (doi:10.1039/d2py00274d), 2022-01-01
Supplement: d2py00274d1.pdf [file d2py00274d1.pdf]

## Taking advantage of $\beta$ -hydroxy amine enhanced reactivity and functionality for the synthesis of dual covalent adaptable networks

Dimitri Berne,<sup>a</sup> Guilhem Coste,<sup>a</sup> Roberto Morales,<sup>a</sup> Marine Boursier,<sup>a</sup> Julien Pinaud,<sup>a</sup> Vincent Ladmiral<sup>\*a</sup>, Sylvain Caillol<sup>\*a</sup>

<sup>a</sup> ICGM, Univ Montpellier, CNRS, ENSCM, Montpellier, France

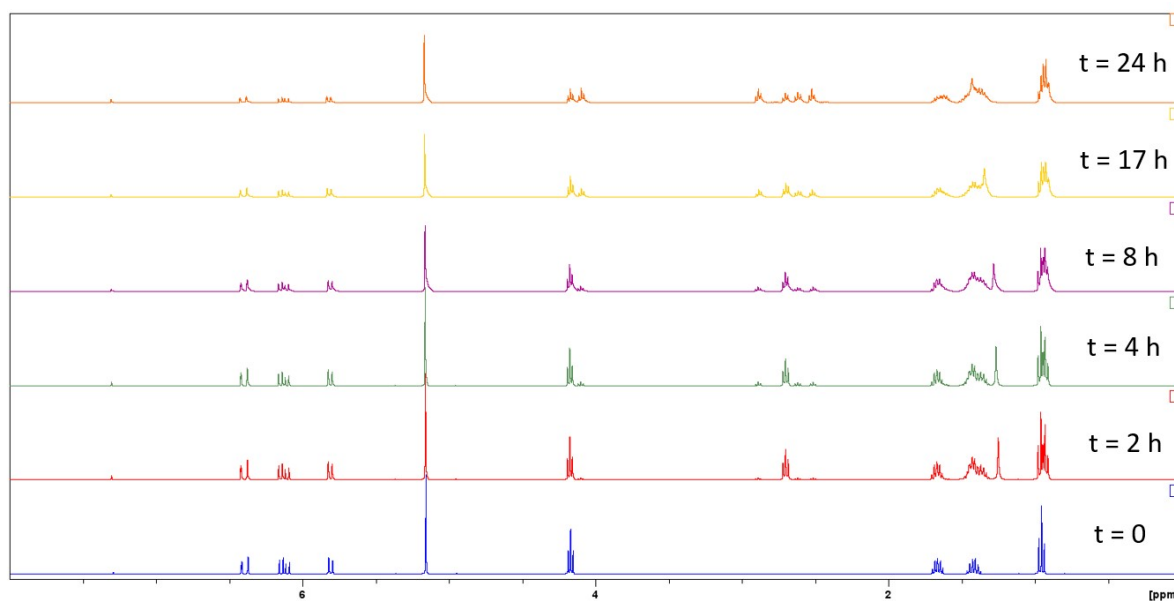

Figure S1. Stacked view of  $^1\text{H}$  NMR ( $\text{CDCl}_3$ , 400 MHz) spectra of the kinetic study of butylacrylate and n-butylamine (entry 4, 1:1 butylacrylate:n-butylamine)

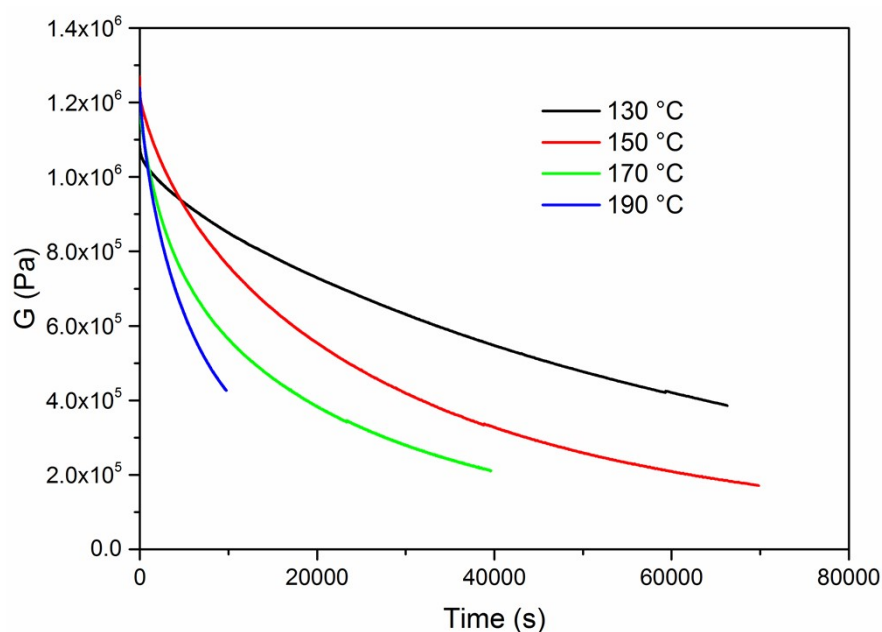

Figure S2. Non-normalized stress-relaxation curves at temperatures ranging from 130 to 190 °C for BHAN

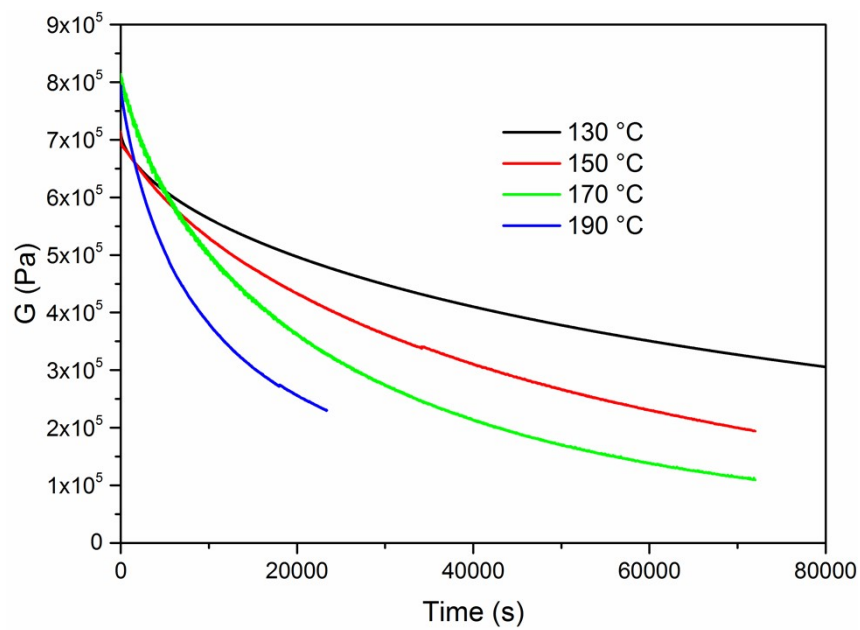

Figure S3. Non-normalized stress-relaxation curves at temperatures ranging from 130 to 190 °C for **AN**

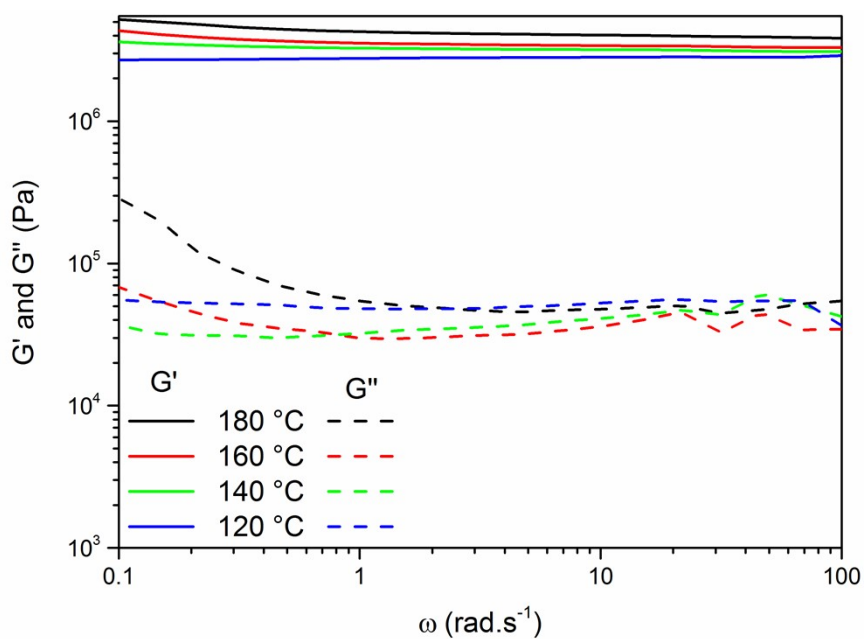

Figure S4. Measurement of  $G'$  (full line) and  $G''$  (dotted line) in frequency sweep from 120 °C to 180 °C of **AN**

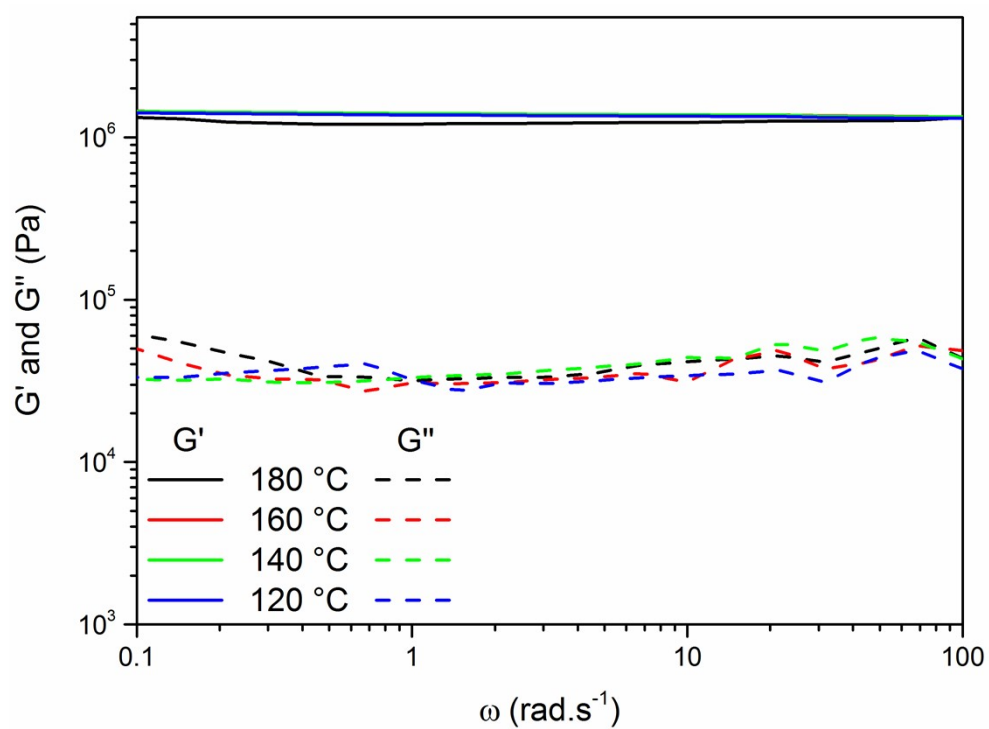

Figure S5. Measurement of  $G'$  (full line) and  $G''$  (dotted line) in frequency sweep from 120 °C to 180 °C of **BHAN**

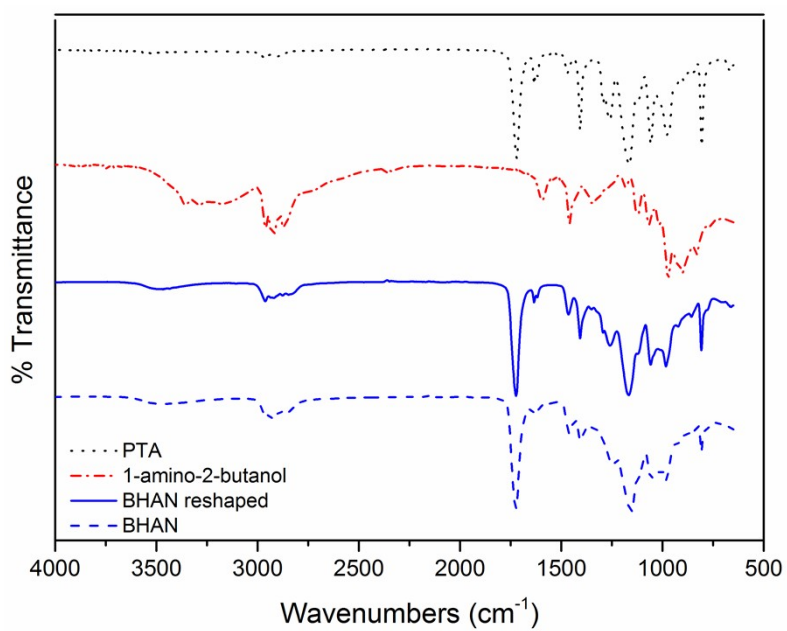

Figure S6. FTIR of **BHAN** (dashed blue line), **BHAN** reshaped (full blue line), 1-amino-2-butanol (red dash-dotted line) and PTA (black dotted line)

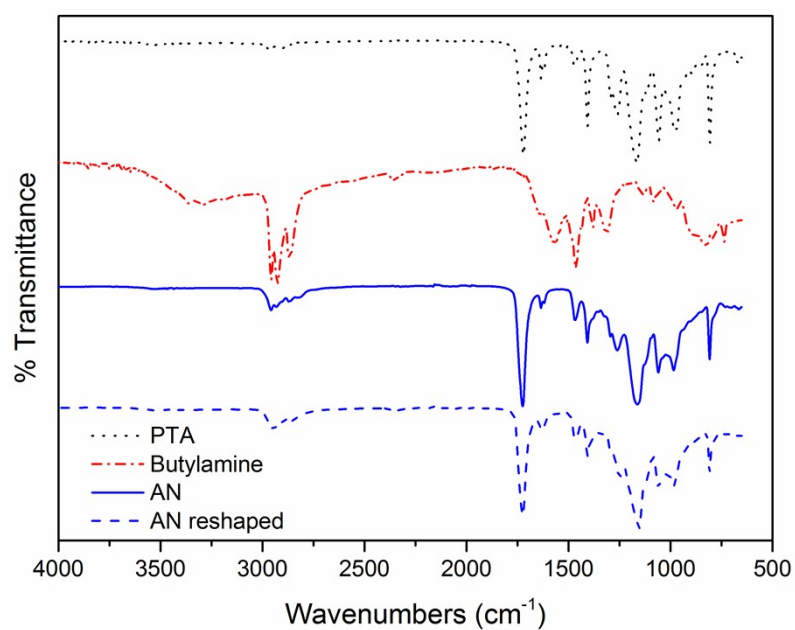

Figure S7. FTIR of **AN** (dashed blue line), **AN** reshaped (full blue line), butylamine (red dash-dotted line) and PTA (black dotted line)

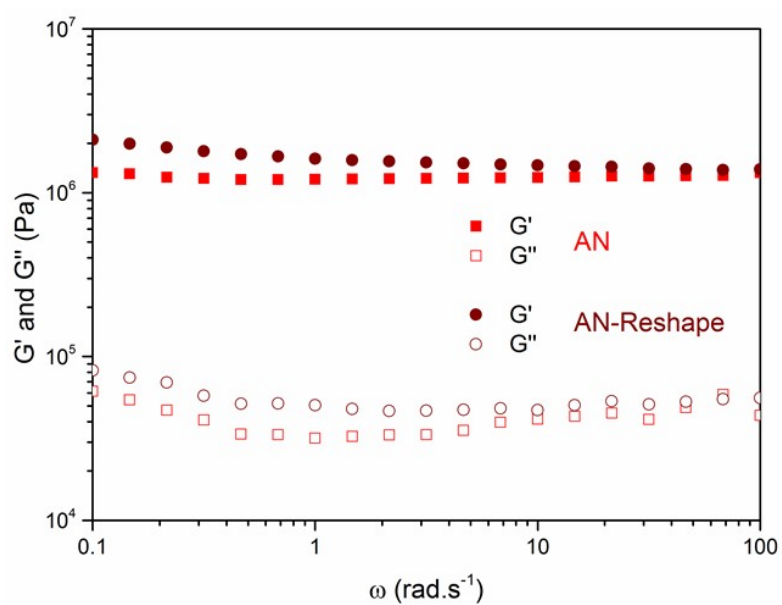

Figure S8. Measurement of  $G'$  (full symbol) and  $G''$  (open symbol) in frequency sweep at 180 °C of **AN** (red square curve) and **AN** reshape (brown circle curve)
